# Supplementary material for: Resolving mechanisms of immune‐mediated disease in primary CD4 T cells
Source: EMBO Mol Med. 2020 Apr 1;12(5):e12112. doi: 10.15252/emmm.202012112 (PMC7207160; doi:10.15252/emmm.202012112)
Supplement: Supplementary file 1 — Appendix [file EMMM-12-e12112-s001.pdf]

## Appendix

### Resolving mechanisms of immune-mediated disease in primary CD4 T cells

**Authors:** Bourges C, Groff AF, Burren OS, Gerhardinger C, Mattioli K, Hutchinson A, Hu T, Anand T, Epping MW, Wallace C, Smith KGC, Rinn JL, Lee JC\*

#### Contents

- **Appendix Table S1.** Summary of tiling analysis.
- **Appendix Table S2.** Primer sequences
- **Appendix Table S3.** gRNA sequences
- **Appendix Table S4.** Exact P values
- **Appendix Figure S1.** Minimal promoter-based MPRA does not work in primary CD4 T cells, but can be successfully adapted using a stronger promoter.
- **Appendix Figure S2.** Scaled Manhattan plots for 14 autoimmune disease associated loci – based on MPRA data from resting CD4 T cells.
- **Appendix Figure S3.** Scaled Manhattan plots for 14 autoimmune disease associated loci – based on MPRA data from stimulated CD4 T cells.
- **Appendix Figure S4.** rs6927172 lies in a highly conserved locus and is predicted to disrupt NF- $\kappa$ B binding.
- **Appendix Figure S5.** rs6927172 disrupts a *TNFAIP3* super-enhancer at 6q23.
- **Appendix Figure S6.** CRISPR-Cas9 editing in resting primary CD4 T cells.

| Chr.  | Haplotype co-ordinates (hg19) | Associated disease(s)     | Driver elements in resting CD4 T cells | Driver elements in stimulated CD4 T cells | Driver elements (bp) |
|-------|-------------------------------|---------------------------|----------------------------------------|-------------------------------------------|----------------------|
| 1p34  | 1:38614767-38644961           | RA                        |                                        |                                           | 294                  |
| 2p15  | 2:62551372-62585241           | AS, Ps                    |                                        |                                           | 557                  |
| 2p24  | 2:12632889-12648793           | ATD                       |                                        |                                           | 310                  |
| 3p24  | 3:28068294-28079185           | MS                        |                                        |                                           | 121                  |
| 4q32  | 4:166558881-166575539         | T1D                       |                                        |                                           | 336                  |
| 5p13  | 5:40522112-40619865           | AS                        |                                        |                                           | 766                  |
| 6p23  | 6:14711861-14734441           | UC, CD, MS                |                                        |                                           | 559                  |
| 6q23  | 6:137959135-138006604         | RA, CeD, UC, CD, SLE, T1D |                                        |                                           | 479                  |
| 8q24  | 8:130602181-130624205         | UC, CD                    |                                        |                                           | 293                  |
| 8q24  | 8:128187774-128207238         | MS                        |                                        |                                           | 32                   |
| 11q21 | 11:95311160-95320908          | ATD, vitiligo             |                                        |                                           | 49                   |
| 14q32 | 14:98485011-98499051          | T1D                       |                                        |                                           | 261                  |
| 21q21 | 21:16804230-16828335          | UC, CD                    |                                        |                                           | 212                  |
| 21q22 | 21:40463183-40468938          | AS, PSC, UC, CD           |                                        |                                           | 82                   |
| 21q22 | 21:36421330-36423329          | Positive control 1        |                                        |                                           | 49                   |
| 1q31  | 1:198626200-198628199         | Positive control 2        |                                        |                                           | 81                   |
| 4p15  | 4:29562525-29564524           | Negative control 1        |                                        |                                           | 0                    |
| 4p15  | 4:34780413-34782412           | Negative control 2        |                                        |                                           | 0                    |

#### Appendix Table S1. Summary of tiling analysis.

Summary results from tiling analysis in resting and stimulated CD4 T cells using the *sharpr2* package

Filled green boxes indicate the presence of high-resolution driver elements with significant regulatory activity (FWER  $P < 0.05$ ) within the genomic sequence of the disease-associated haplotype. Filled grey boxes indicate that no high-resolution driver elements were identified in the region.

Driver elements (bp) indicates the total number of bases within the disease-associated region that were identified as high-resolution driver elements in either resting or stimulated T cells.

Chr., chromosome; AS, Ankylosing Spondylitis; Ps, Psoriasis; PSC, Primary Sclerosing Cholangitis; UC, ulcerative colitis; CD, Crohn's disease; RA, rheumatoid arthritis; CeD, coeliac disease; SLE, Systemic Lupus Erythematosus; T1D, Type 1 Diabetes; ATD, autoimmune thyroid disease; MS, multiple sclerosis.

| Target                        | Sequence                                                                                                                                                    |
|-------------------------------|-------------------------------------------------------------------------------------------------------------------------------------------------------------|
| Oligo-pool amplification      | F: GCTAAGGGCCTAACTGGCCGCTTCACTG<br>R: GTTTAAGGCCTCCGAGGCCGACGCTCTTC                                                                                         |
| MPRA library prep             | F: CAAGCAGAAGACGGCATAACGAGATNNNNNNGTGACTGGAGTTCAGACGTGTGCTCTT<br>CCGATCTAACGAGAAGCGCGATCACA<br>R: AATGATACGGCGACCACCGAGATCTACACTCTTCCCTACACGACGCTCTTCCGATCT |
| TurboGFP                      | F: AGGACAGCGTGATCTTCACC<br>R: CTTGAAGTGCATGTGGCTGT                                                                                                          |
| EGFP                          | F: GCTACCCCGACCACATGAAG<br>R: TCTTGTAGTTGCCGTCGTCC                                                                                                          |
| eRNA PCR_1                    | F: CCCTGGGAGCCTGTGAAAAAT<br>R: AACAGGGAAGCCAGAGATGC                                                                                                         |
| eRNA PCR_2                    | F: CACACGCCAGAAACATCTGC<br>R: TGA CTGTGATTTCTCCCTGAGG                                                                                                       |
| rs1988588<br>SDM              | F: CAACAGAGCGAGACTCCGTC<br>R: CCCAGGCTGGAGTGCAG                                                                                                             |
| rs3902659<br>SDM              | F: GCGGAGCTTGCACTGAGC<br>R: CTCCTGGGTTACGCCAT                                                                                                               |
| Firefly<br>luciferase         | F: GCTCAGCAAGGAGGTAGGTG<br>R: TCTTACCGGTGTCCAAGTCC                                                                                                          |
| Renilla<br>luciferase         | F: ATCGGACCCAGGATTCTTTT<br>R: ACTCGCTCAACGAACGATTT                                                                                                          |
| <i>TNFAIP3</i>                | F: AGGTTCCAATTCGCCCTT<br>R: GAACAGCTCGGATTTCAGGC                                                                                                            |
| <i>OLIG3</i>                  | F: ATTTCCCGCCTAAAGCCTCC<br>R: GTGGACGAGACCGAGTTGAG                                                                                                          |
| <i>IL20RA</i>                 | F: ATGGGCAAAAGAAATGGCTG<br>R: GGTGGGCAATTTGTGTTTCT                                                                                                          |
| <i>IL22RA2</i>                | F: TGGTGTAGCAGGAAGTCAAGTGC<br>R: CTGCTGTTGCCAGTAAGTGC                                                                                                       |
| <i>IFNGR1</i>                 | F: GAAGTGACGTAAGGCCGGG<br>R: TAGTTGGTGTAGGCACTGAGGA                                                                                                         |
| <i>PERP</i>                   | F: TGTGGTGGAAATGCTCCCAA<br>R: TACCCACGCGTACTCCAT                                                                                                            |
| <i>β-Actin</i>                | F: GAGCATCCCCCAAAGTTCA<br>R: AGAGAAGTGGGGTGGCTTTT                                                                                                           |
| <i>HPRT</i> (T7EI)            | F: AAGAATGTTGTGATAAAAAGGTGATGCT<br>R: ACACATCCATGGGACTTCTGCCTC                                                                                              |
| <i>CXCR4</i> (ICE)            | F: GACGCCAACATAGACCACCT<br>R: TGCTTGCTGAATTGGAAGTG                                                                                                          |
| rs6927172<br>locus (ICE)      | F: GTAGTACCCTGGGAGCCTGT<br>R: GTCCTGAGAAGCAGCTTGCT                                                                                                          |
| rs35926684<br>locus (ICE)     | F: GGTGAGGGAAAATCAGACAGA<br>R: GCAGGAATCAGCCATTTCTC                                                                                                         |
| rs17264332<br>locus (ICE)     | F: TCACGAGAATGCCTGCATAG<br>R: TCCCTGATCACATCACTCCA                                                                                                          |
| rs11757201<br>locus (ICE)     | F: GGGTCACTAGTGGAGCCAAA<br>R: CCCCTCAAAAAGTGGACAAA                                                                                                          |
| rs6920220<br>locus (ICE)      | F: CCTTGAGCCACCTGCTTTAG<br>R: AATGCTTGGACCTTGATTGG                                                                                                          |
| <i>TNFAIP3</i><br>gRNA1 (ICE) | F: AAACACTGGGGTTTCCTGCA<br>R: TTACGGGCCAGAGAAGGGTA                                                                                                          |
| <i>TNFAIP3</i><br>gRNA2 (ICE) | F: CTCTTCATCACAGGCCTGCA<br>R: ATCCAAGTGCCTTGTGTGGT                                                                                                          |

#### Appendix Table S2. Primer sequences

NNNNNN in MPRA library prep F primer represents sequencing index. SDM, site-directed mutagenesis; T7EI, T7 endonuclease I assay; ICE, Inference of CRISPR Edits

| Name                     | gRNA sequence (excluding PAM)                             |
|--------------------------|-----------------------------------------------------------|
| HPRT crRNA               | <i>Alt-R CRISPR-Cas9 Positive Control Human HPRT, IDT</i> |
| CXCR4 crRNA              | GAAGCGTGATGACAAAGAGG                                      |
| D_5'_rs6927172 crRNA     | ATATTTCTGGAGCTAATCAAG                                     |
| F_5'_rs6927172 crRNA     | TCAAGTGGCAATGTCAATGG                                      |
| B_3'_rs6927172 crRNA     | GATGGGAATTAAAGTTGACC                                      |
| H_3'_rs6927172 crRNA     | TTCTGCCACTTAGTCATGAT                                      |
| 5'_rs17264332 crRNA      | GTACTTAATAAAATAACAGT                                      |
| 3'_rs17264332 crRNA      | ACTTCAATTGCTCAACAACA                                      |
| 5'_rs11757201 crRNA      | TTTGTTATACTTTAAGTTCT                                      |
| 3'_rs11757201 crRNA      | CACCTATGAGTGAGAACATG                                      |
| 5'_rs35926684 crRNA      | AACATTACTACATTGAAGTG                                      |
| 3'_rs35926684 crRNA      | TTGATTTGATTTGATATGCA                                      |
| 5'_rs6920220 crRNA       | AAGGTTTTGAGACATTGCTA                                      |
| 3'_rs6920220 crRNA       | GATATGGTTCTGTAGAACAA                                      |
| <i>TNFAIP3</i> crRNA 1   | CTTGTGGCGCTGAAAACGAA                                      |
| <i>TNFAIP3</i> crRNA 2   | TATGCCATGAGTGCTCAGAG                                      |
| Negative control 1 crRNA | <i>Alt-R CRISPR-Cas9 Negative Control crRNA #1, IDT</i>   |
| Negative control 3 crRNA | <i>Alt-R CRISPR-Cas9 Negative Control crRNA #3, IDT</i>   |
| tracrRNA                 | <i>Alt-R CRISPR-Cas9 tracrRNA, ATTO™ 550, IDT</i>         |

### Appendix Table S3. gRNA sequences

gRNA sequence (or source if commercially available) shown.

| <b>Fig 2B</b>                                            | <b>P Value</b>             | <b>Fig 5E</b>                                                                     | <b>P Value</b> |
|----------------------------------------------------------|----------------------------|-----------------------------------------------------------------------------------|----------------|
| rs140522                                                 | 0.000760                   | CD69 expression (ATTO+ vs ATTO-cells, DB gRNA combination)                        | 0.0067         |
| rs1893592                                                | 4.10E-11                   | CD69 expression (ATTO+ vs ATTO-cells, DH gRNA combination)                        | 0.0146         |
| rs1923187                                                | 7.49E-19                   | CD69 expression (ATTO+ vs ATTO-cells, FH gRNA combination)                        | 0.0034         |
| rs41268482                                               | 3.61E-12                   |                                                                                   |                |
| rs5889371                                                | 0.065121                   | <b>Fig 5F</b>                                                                     | <b>P Value</b> |
| rs9283753                                                | 0.068112                   | Linear regression of increase in Phospho-IkBα vs editing efficiency               | 0.00099        |
| rs9661285                                                | 0.027677                   |                                                                                   |                |
| GATA1                                                    | 0.008371                   | <b>Fig 5G</b>                                                                     | <b>P Value</b> |
| NF-κB                                                    | 0.000570                   | IFNγ: DB gRNA combination vs NTC                                                  | 0.0057         |
| RUNX1                                                    | 1.31E-08                   | IFNγ: DH gRNA combination vs NTC                                                  | 0.0031         |
| Neg. control                                             | 0.720853                   | IFNγ: FH gRNA combination vs NTC                                                  | 0.0056         |
| <b>Fig 3A</b>                                            | <b>P Value (FDR-corr.)</b> | IL-17: DB gRNA combination vs NTC                                                 | 0.0136         |
| rs1736137 (resting T cells)                              | 8.21E-13                   | IL-17: DH gRNA combination vs NTC                                                 | 0.0248         |
| rs1736137 (stim. CD4 T cells)                            | 1.76E-12                   | IL-17: FH gRNA combination vs NTC                                                 | 0.0164         |
|                                                          |                            | IL-4: DB gRNA combination vs NTC                                                  | 0.0075         |
| <b>Fig 3B</b>                                            | <b>P Value (FDR-corr.)</b> | IL-4: DH gRNA combination vs NTC                                                  | 0.0078         |
| rs6759298                                                | 1.17E-12                   | IL-4: FH gRNA combination vs NTC                                                  | 0.0089         |
| rs13001372                                               | 0.856276                   |                                                                                   |                |
| rs4672505                                                | 0.372014                   | <b>Appendix Fig S4C</b>                                                           | <b>P Value</b> |
| <b>Fig 4C</b>                                            | <b>P Value (FDR-corr.)</b> | Allele-specific NF-κB binding to MPRA vector (major vs minor allele at rs6927172) | 0.00013        |
| rs6927172 (resting T cells)                              | 2.13E-07                   |                                                                                   |                |
| rs6927172 (stim. CD4 T cells)                            | 2.81E-07                   | <b>Appendix Fig S6C</b>                                                           | <b>P Value</b> |
| <b>Fig 4E</b>                                            | <b>P Value</b>             | rs35926684 deletion: TNFAIP3 expression vs NTC                                    | 0.995          |
| Allele-specific NF-κB binding                            | 0.0037                     | rs17264332 deletion: TNFAIP3 expression vs NTC                                    | 0.3621         |
| <b>Fig 4F</b>                                            | <b>P Value</b>             | rs11757201 deletion: TNFAIP3 expression vs NTC                                    | 0.6243         |
| Allele-specific expression (RNA)                         | 0.0006                     | rs6920220 deletion: TNFAIP3 expression vs NTC                                     | 0.353          |
| <b>Fig 4I</b>                                            | <b>P Value</b>             | rs6927172 deletion: TNFAIP3 expression vs NTC                                     | < 0.0001       |
| TNFAIP3 eQTL CD4 T cells (active IBD)                    | 0.04662                    |                                                                                   |                |
| <b>Fig 5D</b>                                            | <b>P Value</b>             | <b>Appendix Fig S6D</b>                                                           | <b>P Value</b> |
| Change in TNFAIP3 transcription vs non-targeting control | < 0.0001                   | CD69: ETS2 gRNA1 vs NTC                                                           | 0.0237         |
|                                                          |                            | CD69: ETS2 gRNA2 vs NTC                                                           | 0.0457         |
|                                                          |                            | <b>Appendix Fig S6D</b>                                                           | <b>P Value</b> |
|                                                          |                            | IFNγ: ETS2 gRNA1 vs NTC                                                           | 0.0135         |
|                                                          |                            | IFNγ: ETS2 gRNA1 vs NTC                                                           | 0.0491         |
|                                                          |                            | IL-17: ETS2 gRNA1 vs NTC                                                          | 0.0499         |
|                                                          |                            | IL-17: ETS2 gRNA1 vs NTC                                                          | 0.0447         |
|                                                          |                            | IL-4: ETS2 gRNA1 vs NTC                                                           | 0.0692         |
|                                                          |                            | IL-4: ETS2 gRNA1 vs NTC                                                           | 0.0447         |

#### Appendix Table S4. Exact P values

Exact P values or FDR-corrected P values (FDR-corr.) for all comparisons in manuscript

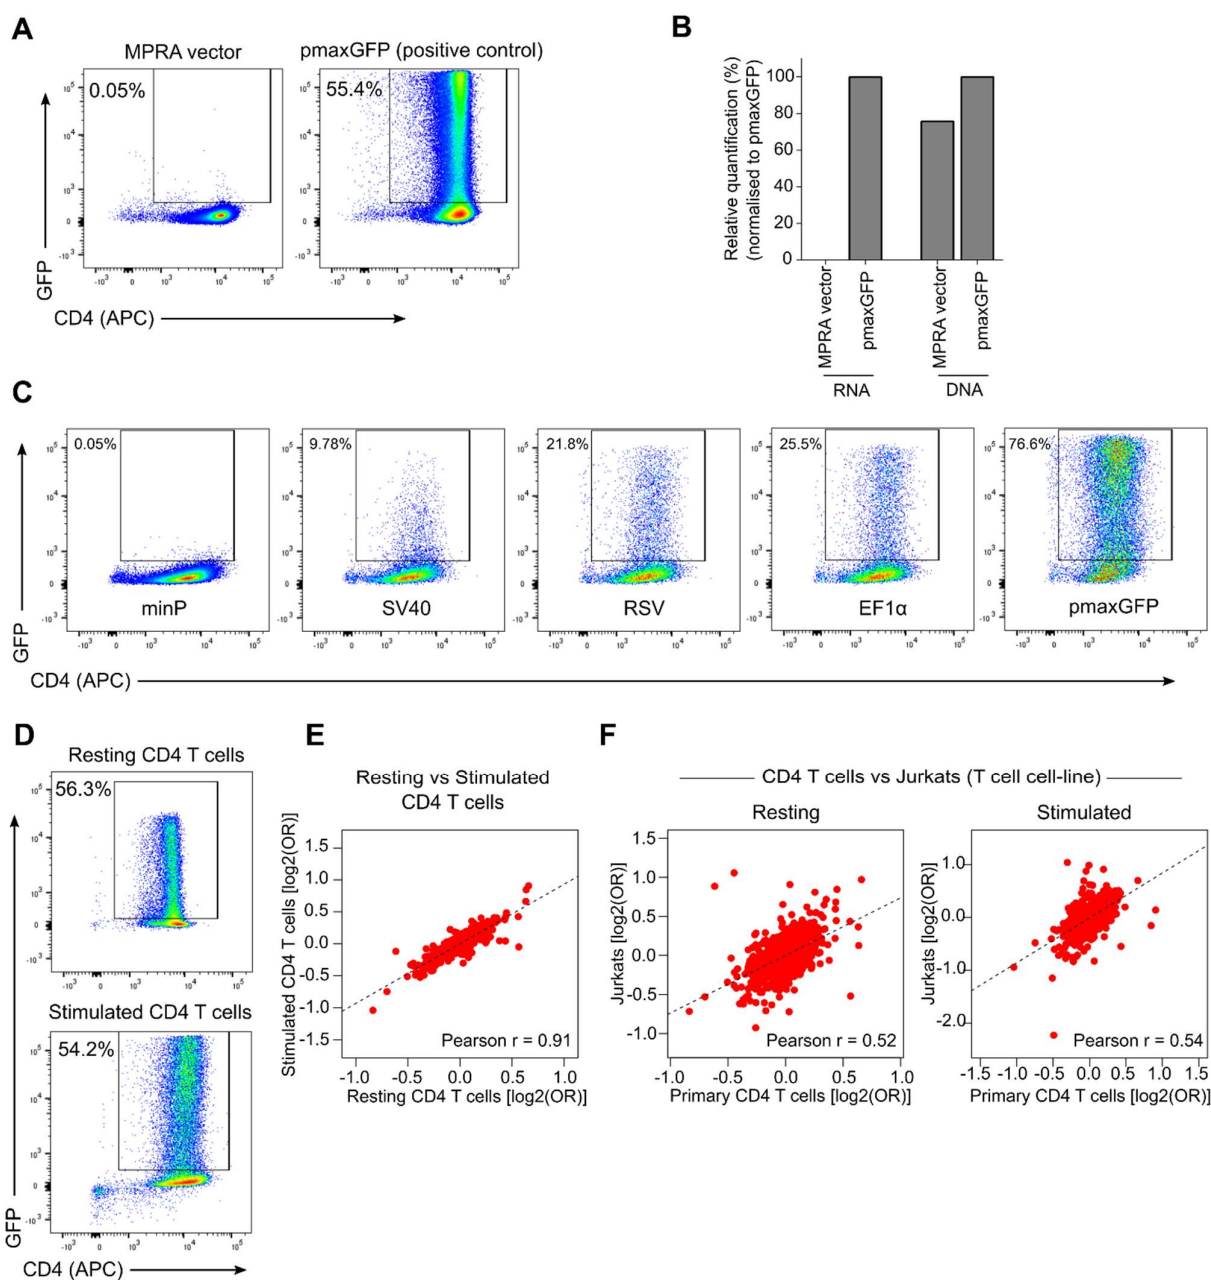

**Appendix Figure S1. Adaptation of MPRA for use in primary CD4 T cells.**

**A** Nucleofection of a minimal promoter-based MPRA vector into primary CD4 T cells does not lead to detectable GFP expression after 24 hours, unlike the positive control vector (pmaxGFP). **B** 24 hours after transfecting a minimal promoter-based MPRA vector into primary CD4 T cells, the vector can be recovered from the cells – confirming successful transfection – but no GFP RNA is detectable. Quantification by qPCR. **C** Flow cytometric assessment of the activity of a series of alternate promoters in primary CD4 T cells – all assayed 24 hours after transfection of 2 $\mu$ g vector into 5M CD4 T cells. **D** Representative plots of GFP expression 24 hours after nucleofecting an adapted MPRA vector (containing the RSV promoter, 5 $\mu$ g) into resting and stimulated primary CD4 T cells. **E** Comparison of SNP effects (log2(OR)) in resting and stimulated primary CD4 T cells. **F** Comparison of SNP effects (log2(OR)) in CD4 T cells and Jurkats (left panel, unstimulated; right panel, stimulated) revealing weaker correlation with several discordant effects.

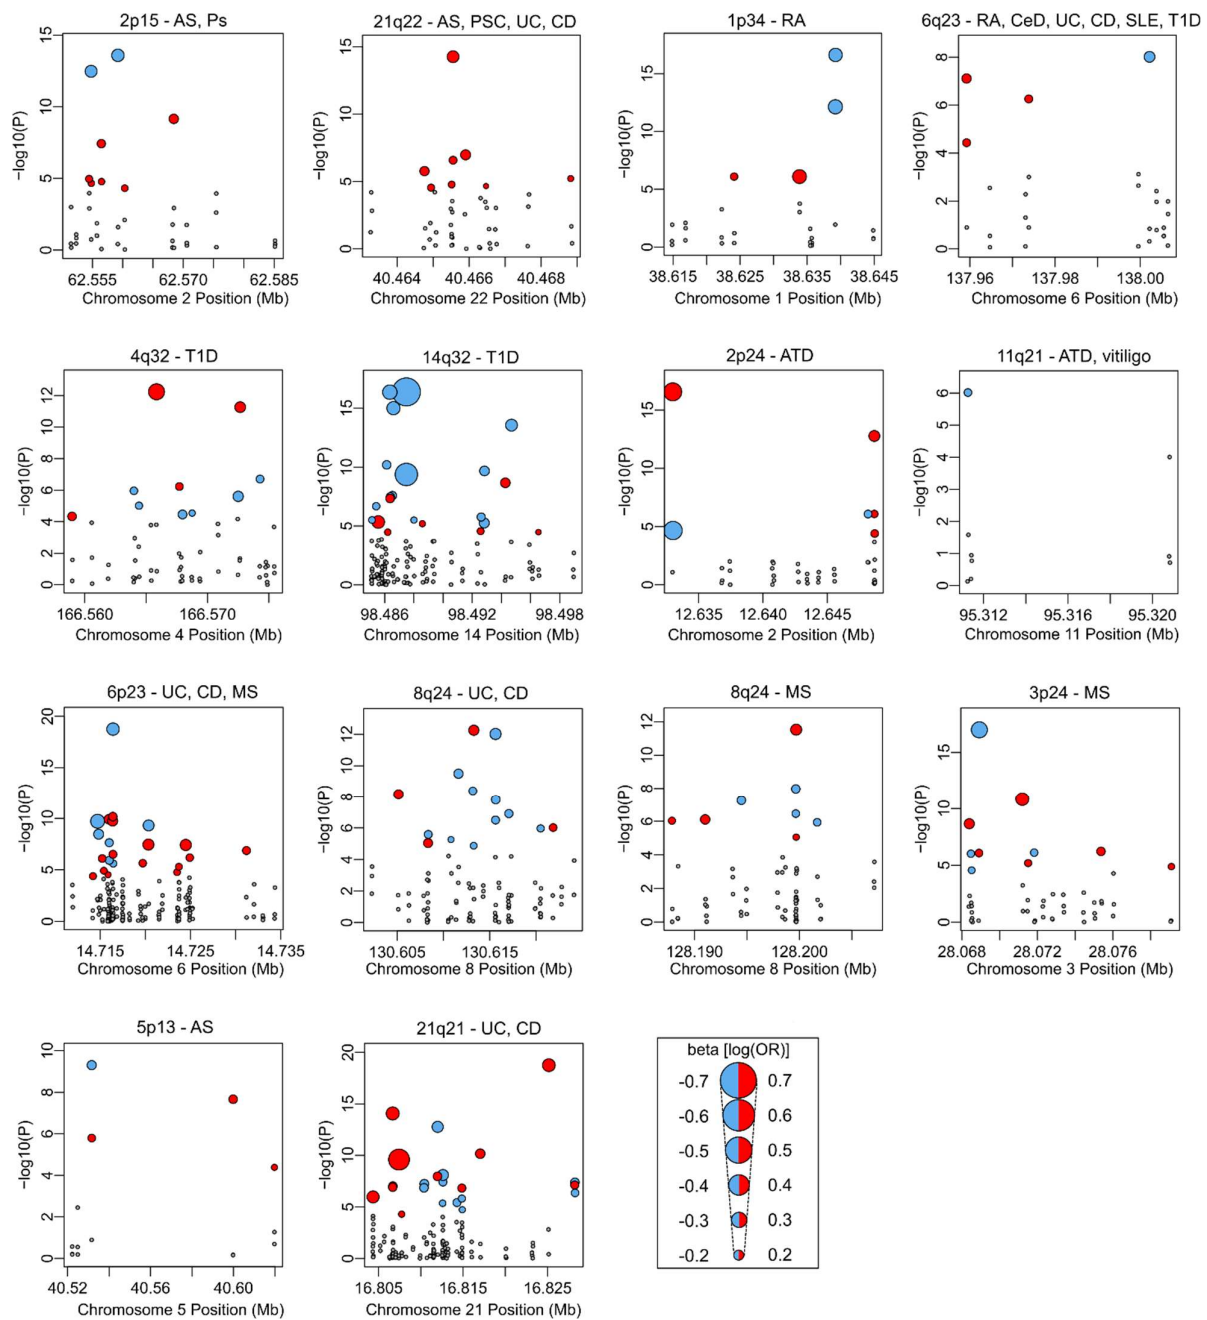

**Appendix Figure S2. Scaled Manhattan plots for 14 autoimmune disease associated loci – based on MPRA data from resting CD4 T cells.**

Scaled Manhattan plots of candidate SNPs in 14 autoimmune disease associated loci – based on expression-modulating effects in resting CD4 T cells. For SNP constructs with significant expression modulating effects (meta analysis  $P < 0.05/970$ ) the size of each point is scaled to the effect size observed in the assay. The colour indicates the direction of the expression-modulating effect with respect to the risk allele. SNP constructs that did not pass this significance threshold are shown in grey. AS, Ankylosing Spondylitis; Ps, Psoriasis; PSC, Primary Sclerosing Cholangitis; UC, ulcerative colitis; CD, Crohn's disease; RA, rheumatoid arthritis; CeD, coeliac disease; SLE, Systemic Lupus Erythematosus; T1D, Type 1 Diabetes; ATD, autoimmune thyroid disease; MS, multiple sclerosis.

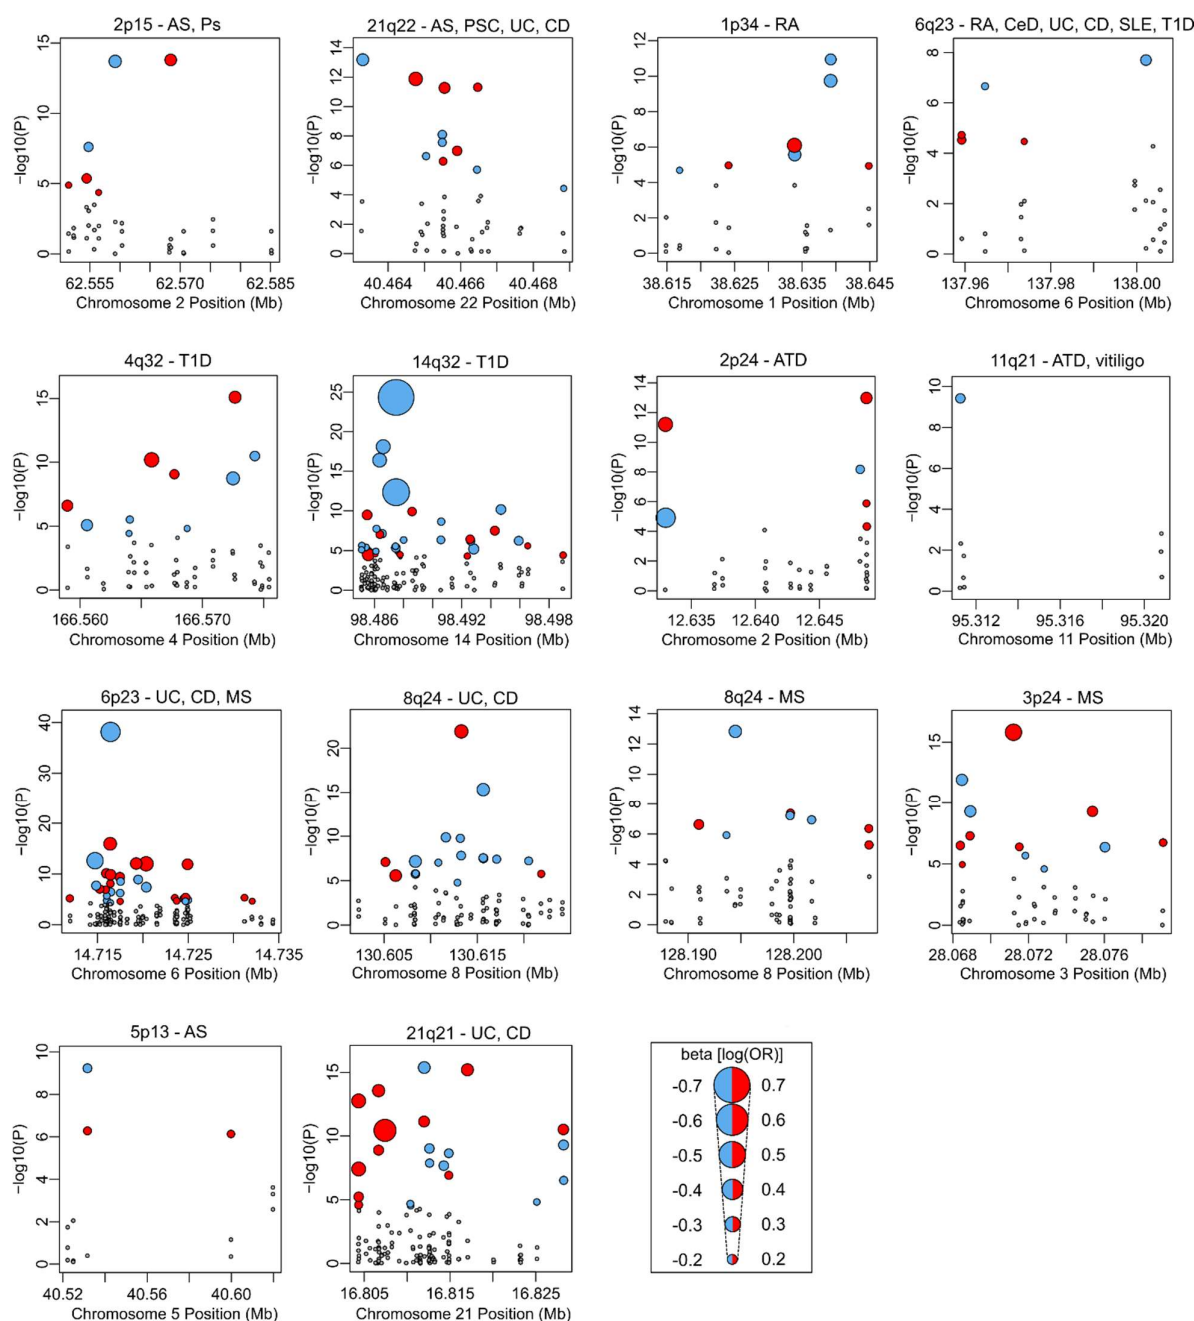

**Appendix Figure S3. Scaled Manhattan plots for 14 autoimmune disease associated loci – based on MPRA data from stimulated CD4 T cells.**

Scaled Manhattan plots of candidate SNPs in 14 autoimmune disease associated loci – based on expression-modulating effects in stimulated CD4 T cells. For SNP constructs with significant expression modulating effects (meta analysis  $P < 0.05/970$ ) the size of each point is scaled to the effect size observed in the assay. The colour indicates the direction of the expression-modulating effect with respect to the risk allele. SNP constructs that did not pass this significance threshold are shown in grey. AS, Ankylosing Spondylitis; Ps, Psoriasis; PSC, Primary Sclerosing Cholangitis; UC, ulcerative colitis; CD, Crohn's disease; RA, rheumatoid arthritis; CeD, coeliac disease; SLE, Systemic Lupus Erythematosus; T1D, Type 1 Diabetes; ATD, autoimmune thyroid disease; MS, multiple sclerosis.

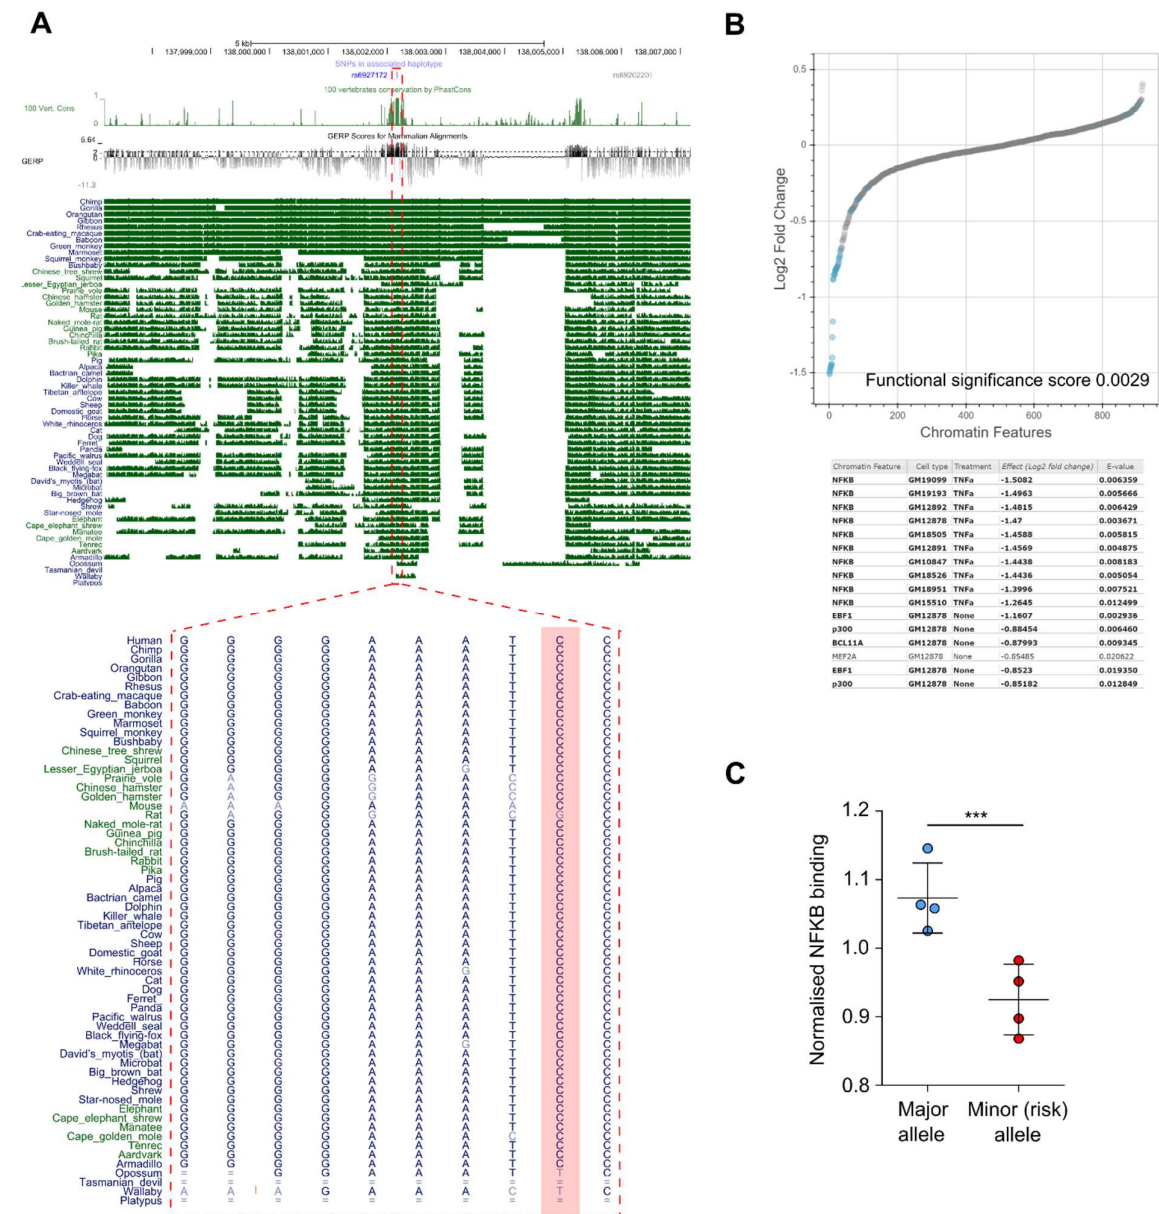

**Appendix Figure S4. rs6927172 lies in a highly conserved locus and is predicted to disrupt NF-κB binding.**

**A** Three analyses of conservation: PhastCons, Genomic Evolutionary Rate Profiling (GERP) and Multiz all show that rs6927172 lies in a highly conserved region. Data from UCSC Genome Browser. rs6927172 highlighted in pink in lower panel. **B** DeepSEA analysis of candidate SNPs at 6q23 locus (using machine learning of regulatory sequence code from ENCODE chromatin-profiling data) predicts that rs6927172 is functionally significant with a significant effect on NF-κB binding. Inset table shows top results for rs6927172 ordered by effect size. **C** Following nucleofection of the MPRA vector library into primary CD4 T cells from 4 healthy individuals, cells were cross-linked and NF-κB immunoprecipitation was performed. Isolated plasmids were sequenced to assess for differential NF-κB binding. A SNP construct for rs6927172 showed significant allele-specific NF-κB-binding, with reduced binding to the risk allele containing vector.



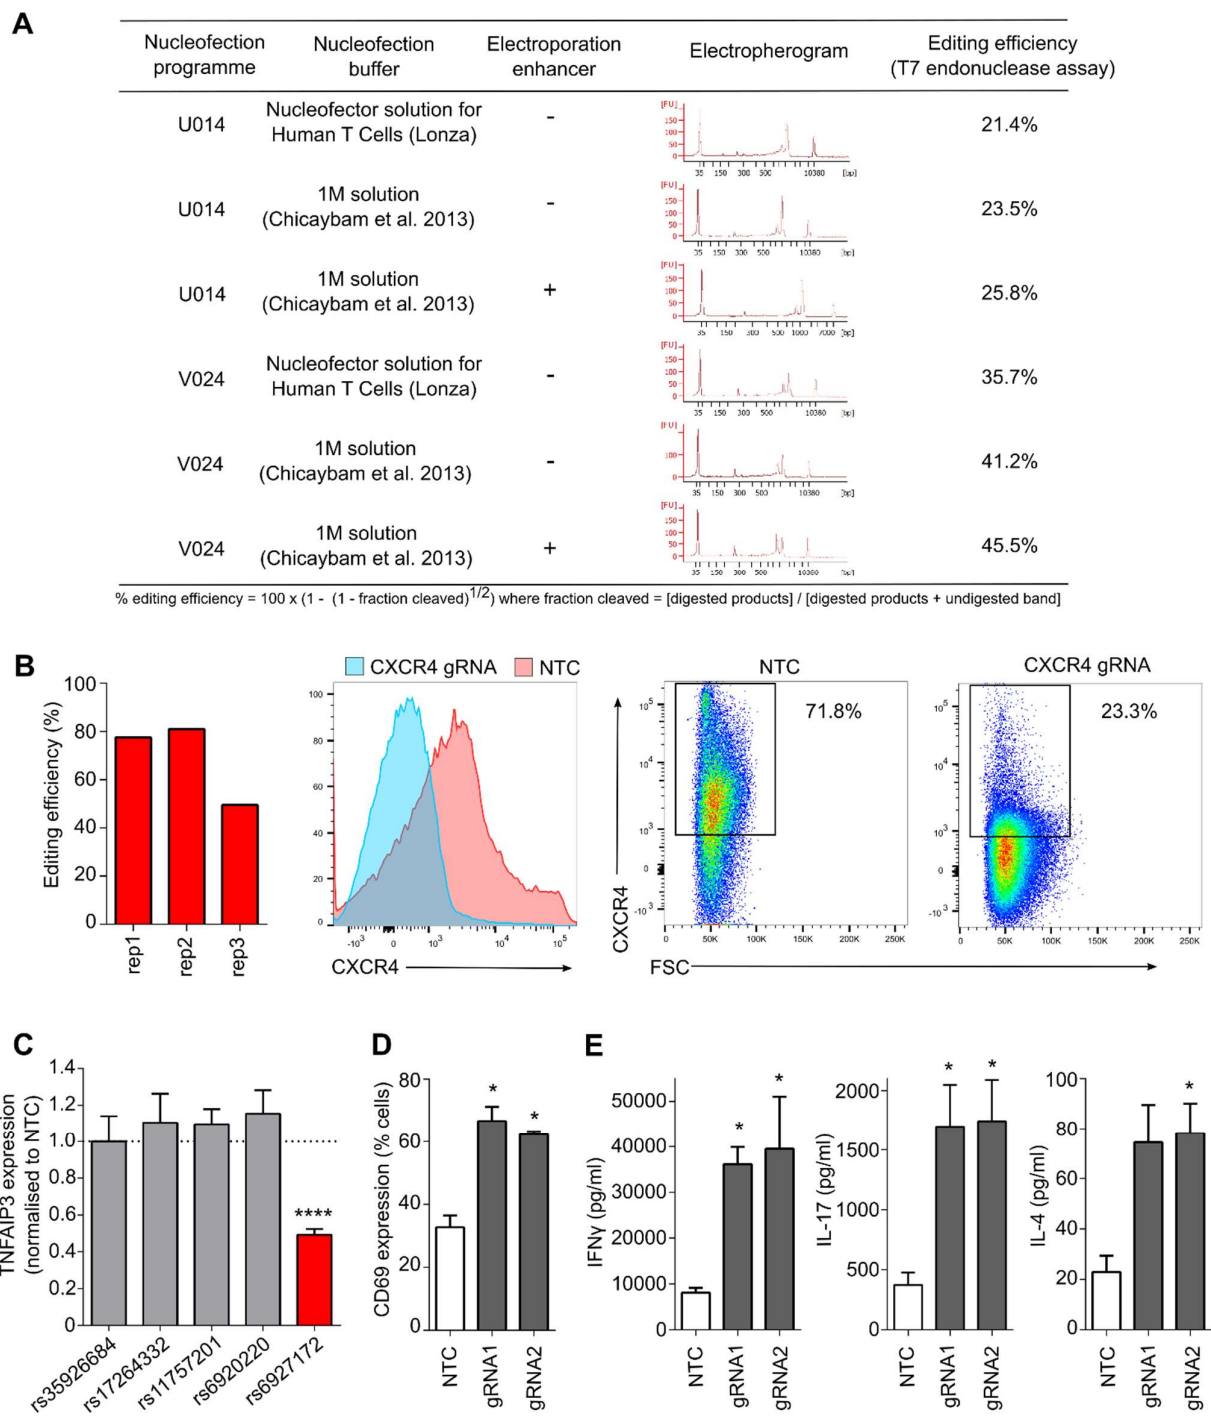

**Appendix Figure S6. CRISPR-Cas9 editing in resting primary CD4 T cells.**

**A** Optimisation of CRISPR editing in resting CD4 T cells using a Cas9 RNP containing positive control gRNA (targeting *HPRT*). On-target editing was assessed using a T7 Endonuclease assay. **B** Editing efficiency at the *CXCR4* locus assessed using ICE (left panel). Representative histograms and flow cytometry plots of *CXCR4* expression on CD4 T cells following CRISPR editing (right panels). **C** *TNFAIP3* expression in EU-containing mRNA (EU added at time of stimulation) following individual deletions of candidate SNPs within the *TNFAIP3* super-enhancer (data from a minimum of 4 biological replicates). Mean indel rates: rs35926684, 55.0%; rs17264332, 54.2%; rs11757201, 52.0%; rs6920220, 72.1%; rs6927172, 64.5%). **D** Percentage of CD4 T cells expressing CD69, an activation marker, following CRISPR editing of *TNFAIP3* (n=4, paired *t*-test, one-tailed). **E** Secretion of IFN $\gamma$ , IL-17A and IL-4 following CRISPR editing of *TNFAIP3* in activated CD4 T cells (n=4, paired *t*-test, one-tailed). Data represent mean  $\pm$  SEM. \* *P* < 0.05; \*\*\*\* *P* < 0.0001.
